# Supplementary material for: Thermal property and structural molecular dynamics of organic–inorganic hybrid perovskite 1,4-butanediammonium tetrachlorocuprate
Source: Royal Society of Chemistry journal article supplement (doi:10.1039/d0ra06551j), 2020-01-01

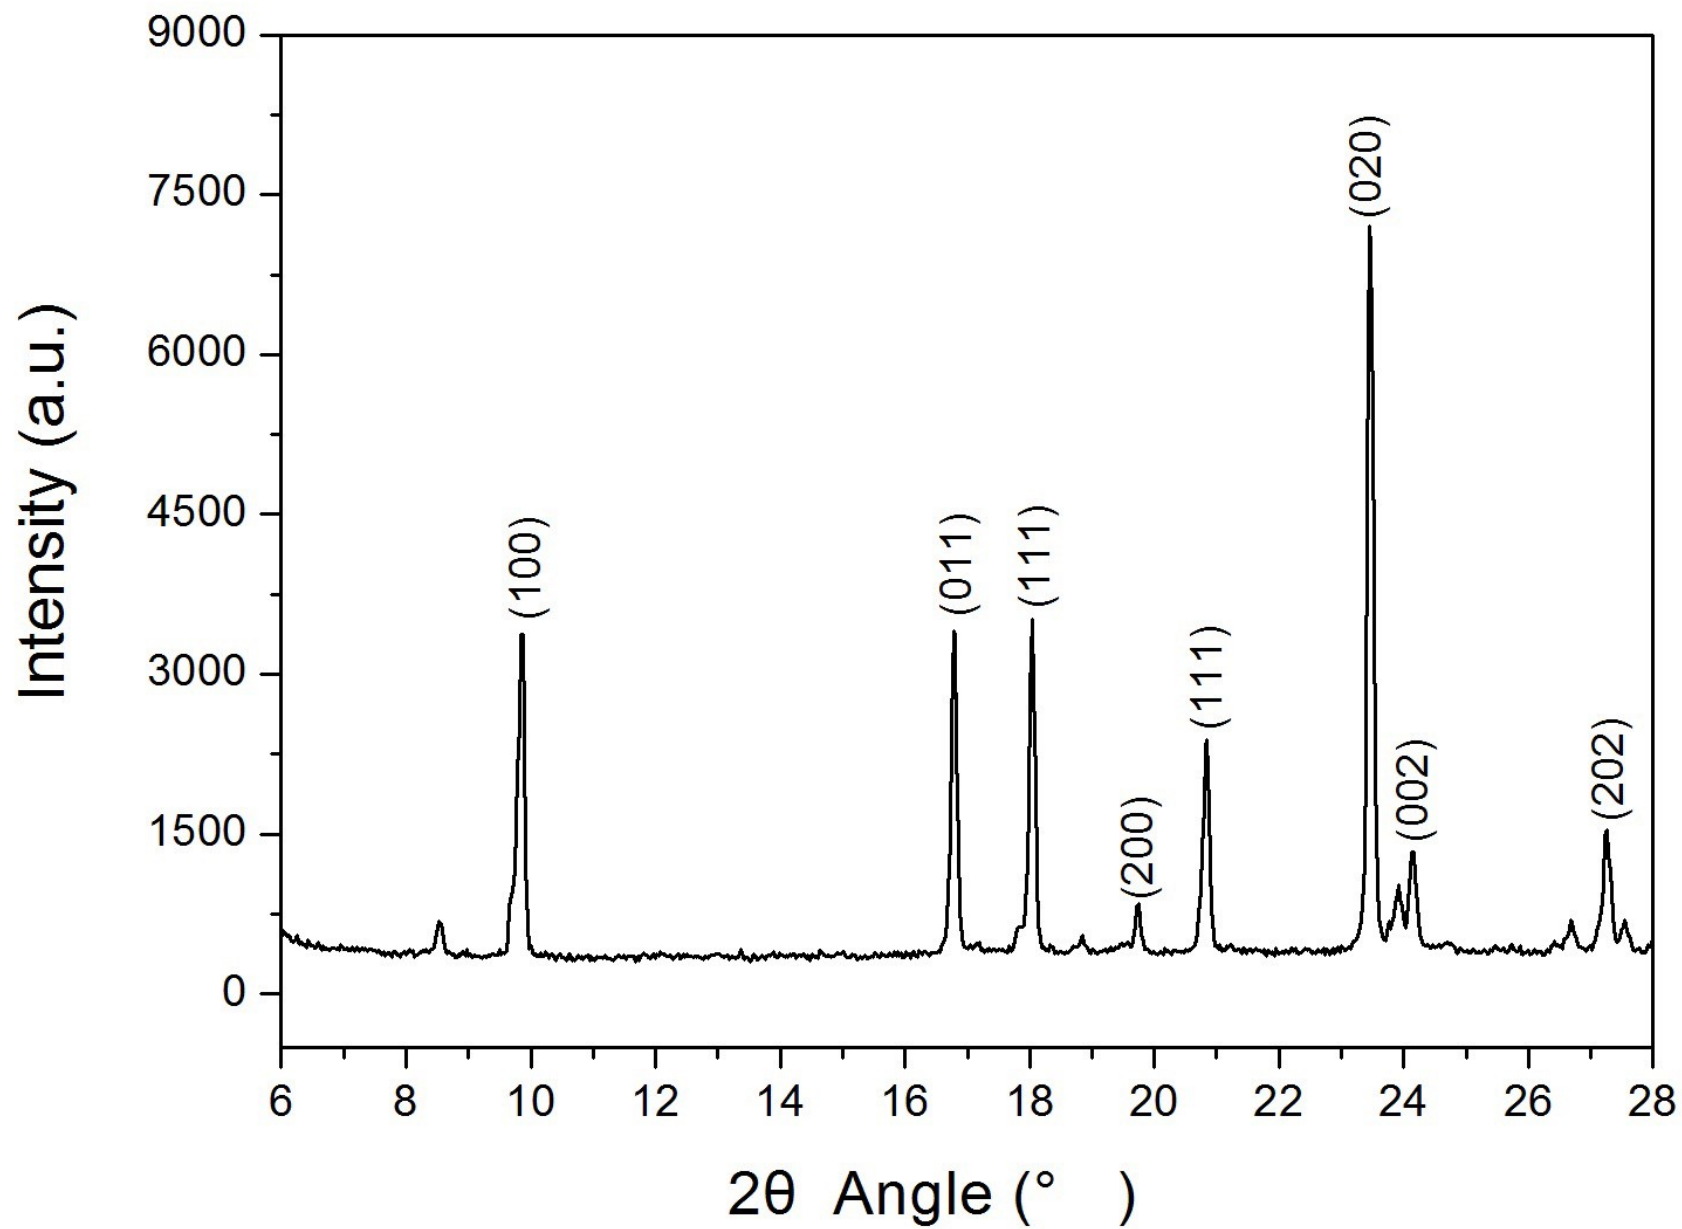

Supplement: d0ra06551j1.pdf [file d0ra06551j1.pdf]
